# Supplementary material
Source: PubMed Central journal article supplement (PMC3412273)

# Suppl 1

DN - Dryvax -naive  
 DI - Dryvax -immune  
 C - Controls

## A

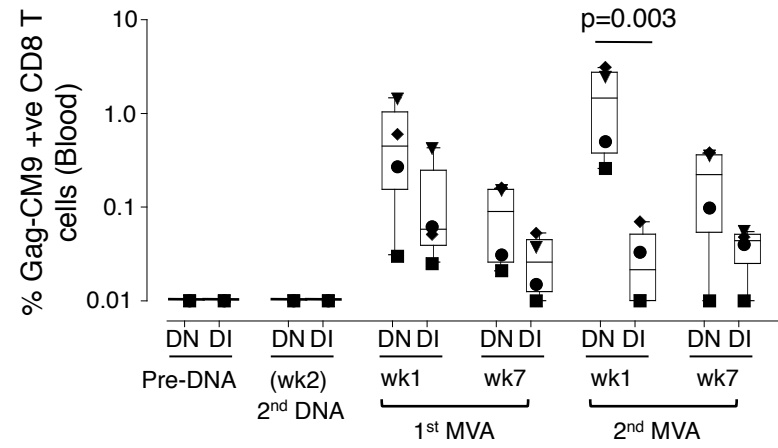

## B

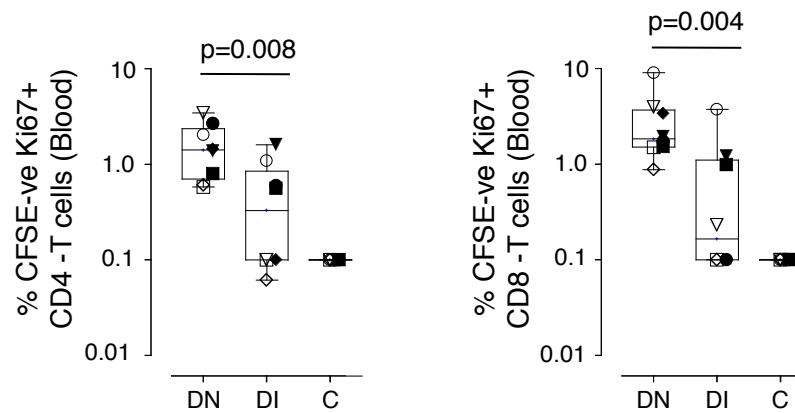

# Suppl 2

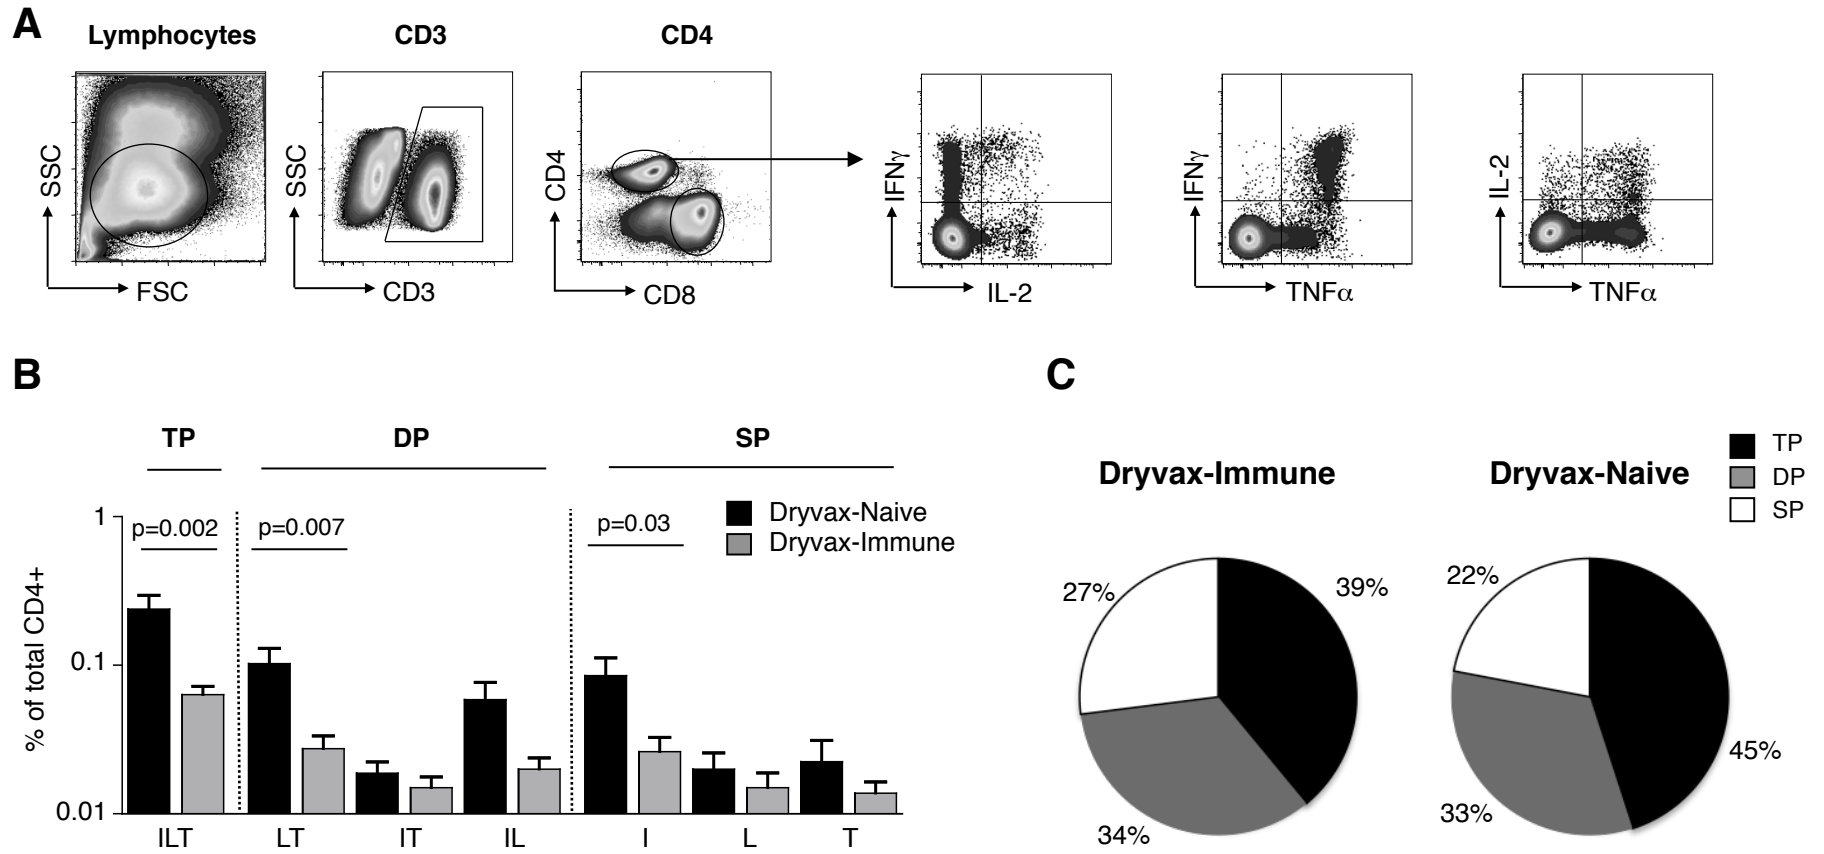

Suppl 3

▲ Dryvax-Naive  
■ Dryvax-Immune

A

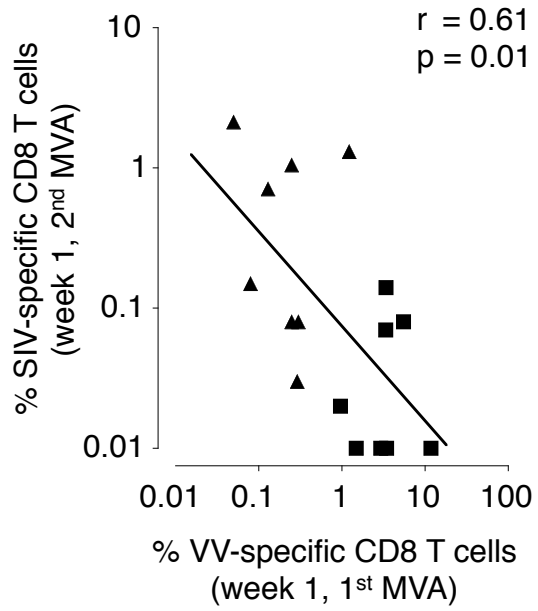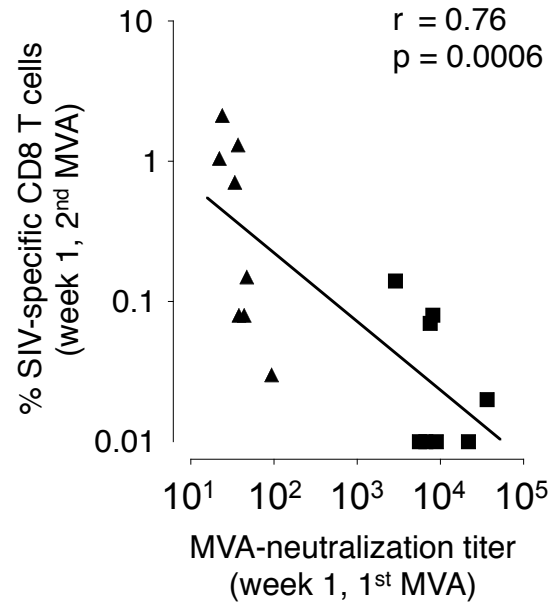

Suppl 4

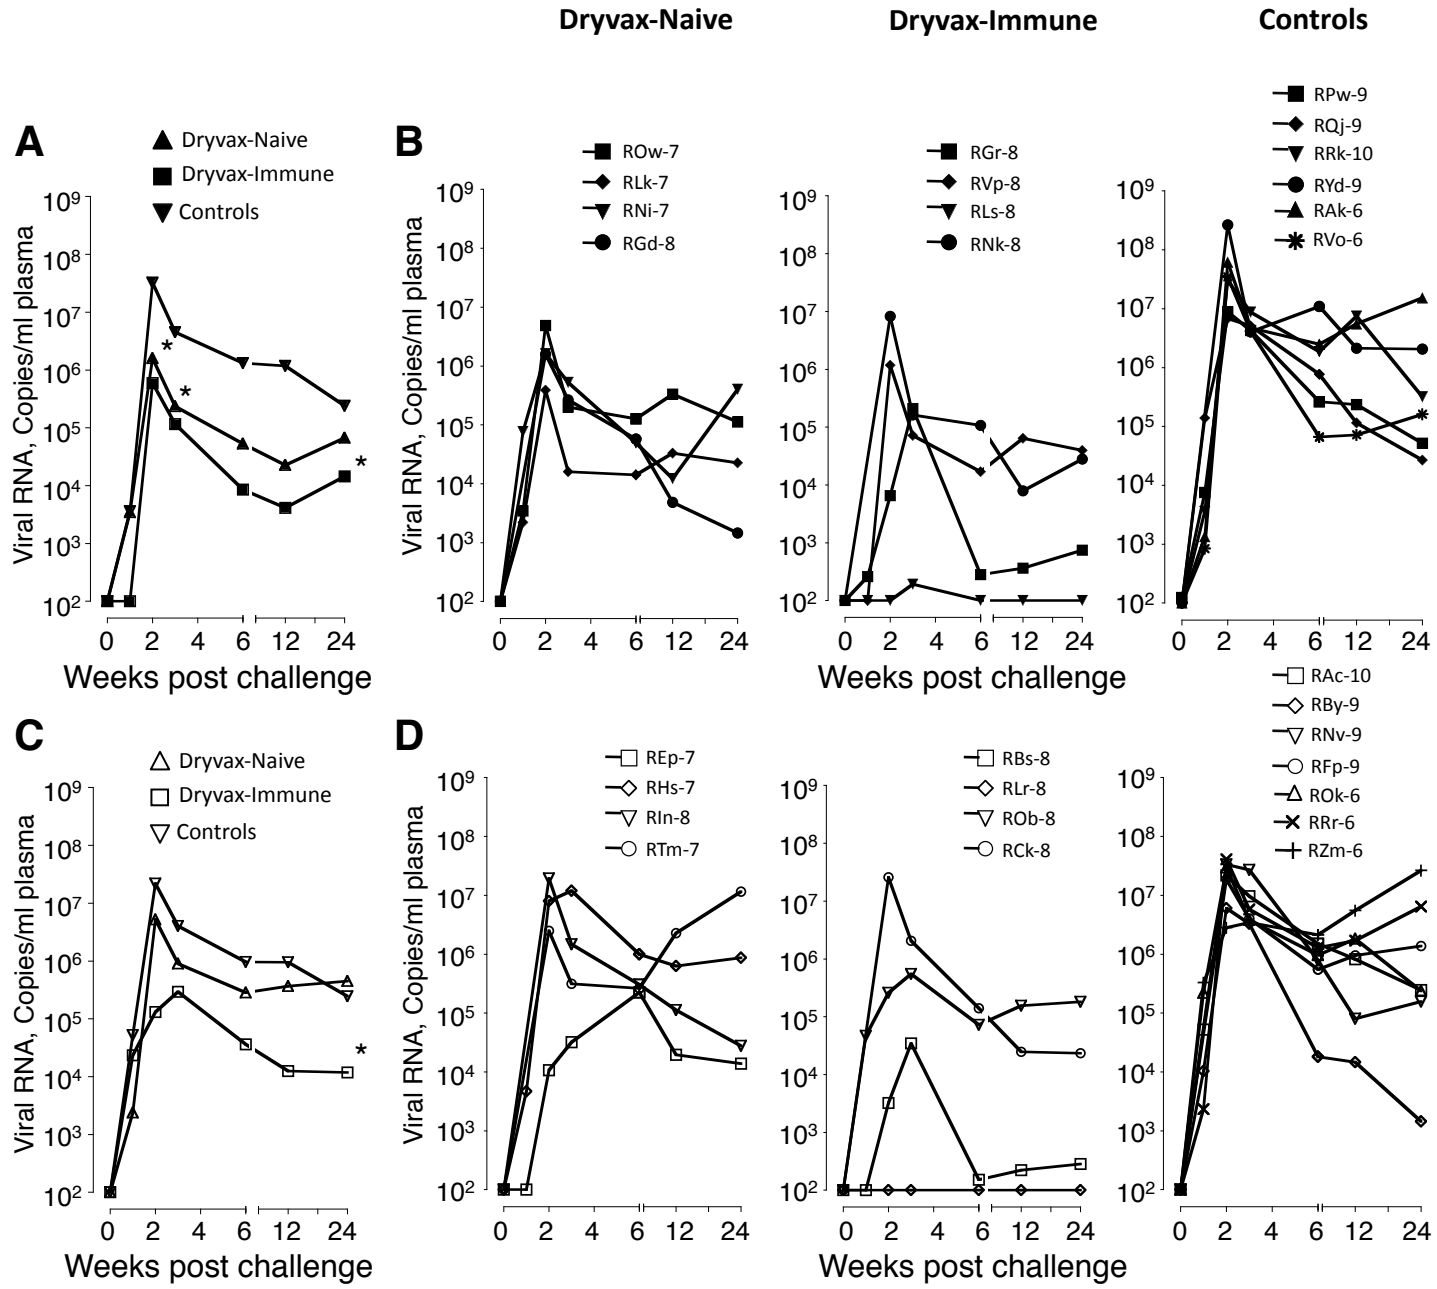

A\*01

Non A\*01

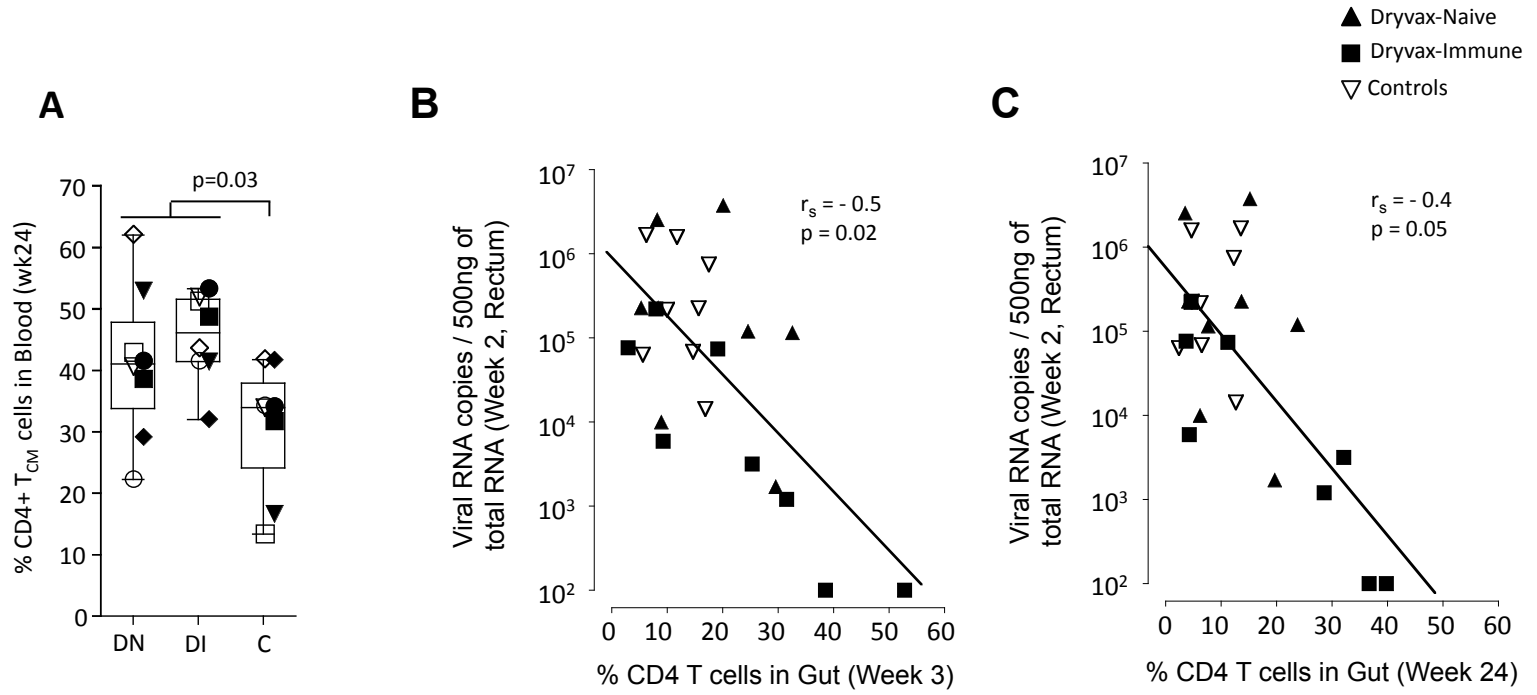

Supplement: NIHMS396161-supplement-Suppl_Figures_1-5.pdf [file NIHMS396161-supplement-Suppl_Figures_1-5.pdf]
